# Supplementary material for: Characterization of broad-host-range Salmonella phage GSP006 and its efficacy in controlling Salmonella Pullorum contamination in poultry feed and drinking water
Source: BMC Biotechnol. 2026 Jan 15;26:19. doi: 10.1186/s12896-026-01100-w (PMC12892657; doi:10.1186/s12896-026-01100-w)
Supplement: Supplementary file 2 — Supplementary Material 2 [file 12896_2026_1100_MOESM2_ESM.xlsx]

## Sheet: Sheet1
Table S3. List of annotated ORFs with the size and location in GSP006 genome.
ORF	name	conting	start	stop	strand
ORF1	hypothetical protein	ttgtttcagtttgcccgttggaacttcataacccgccacgaaaggcgcaagtttgacagtatagccgacgggcacaaagccgcgcttatcgctatgggggtaatagaagacgcggaagaaacaacgcaggacgccgggcctgaatgcccccctgaactactaaccacttttgagaagtatcgtgatgttaaatttacccgccgcgtcgatgacgacggcgtaaagctatatccgagagagcaacttagctggtcggatttagtggcatatagcactatttcaggtcagaatatagggatgtttgaatctgaaattatcatgggcttagacgccatttttgagggcagaaacgatggctga	15	374	+
ORF2	tail length tape-measure protein	atggctgatgtagctagcttagtagtaaaggtaaccgaacaaggcgcgaaggccacatcagaccgtcttgataacctctctaaatccgcaaaagttgcgggcgccgctgttaccggcctggccgccgttgtagccgctacagcctataaggcggctcaggaactagtcgagtcacaacggcaactggataagatgtcggccagcctgaaaacactaaccggaagcacacaaggtgcaaaacaggccctgagtatattacaggacttcgctcgtgacacaccttacggccttgaacaggcggtagaagggttccgtaaactggtagctctaggcctcaccccatcagaagaagcgctacgctcttacggcaatactgcatcagcgatgggtaaagacctt…	367	2700	+
ORF3	hypothetical protein	atgagcgattaccatttcccggcctctttgaggccgatagtatcgaaaggatactcgatgactcgcggcaacaacgtgtggcgggtagacctggccggtggcggagttcgccaggggcgcgatacctattttgatgtgttcccgattaacgttaccctggtcgtatcaccgttggggcggcaagcattcctcagtttcatggagaaggtagacggaggggcttccagtttctggatgaaacacgacttgggtcagggtattgaggattatcaggttactctaacatctacgtggaacgagtccaccgacgacgggaagaactgggtaataactttcacggccacagccgagaaatcaccattccaggaagtcggcagcgcctgtcttaaccagaatctg…	2702	3202	+
ORF4	hypothetical protein	atgagtcaggaatcagtagaagcggcataccggcgtaagctggcgtccaatcccgatggcgagatggattttattaccctggagatatcccaccctcttctttcgaagcgctggttgcttgtgcgcggggctaacgacttgaccgctactctagagacgggtgaggttgttacattcgagggtacgccgatggaggccaagaacgccgccaacaataacgatatggaccagaccgcctctttctctttgccggatgtgcttaatatactggacgaggaaatggaccgcatcccttatgataataaggaattgcccaaattcatcttccggcgttacgtgagcacggacctgtcgtacccatgcgatgggccggtggtatatgaattgcaaacactcacg…	3199	3714	+
ORF5	hypothetical protein	atgaatattaacgattacactggcctgccgtatgacttccgccgccgtaattgttggcaccacgtccgcaacgtccgggctgacgcggggttatcaactccaatgttcgatgtaacaagcccaacggcaatagatgcagctttcgatgacggccattcagaccctaaaggtcttaggcgagtgcttactccgcagaattttgacgccgttctactcggtgtgaaacatcgagggcggatagtgtggcacgctggggtatattacgaagggatggttagccactgtgagctggcgtccagacaggttagactggatagtctggaagaccttaaagatacttattcggagattgaattttggcgctag	3711	4076	+
ORF6	tail fiber protein	ttggcgctagtaattcactacacacgaaacgaagacggcacatttgacgttaaacgttatcgcgataatccgatgaacttcgtcgtgaaccacgttccggacggggttccggtacgtgttttcatcgacgaaatcggagaagataacgacgtaacagaagacttcgaagcactgaaagaaaacgcgactttccacattgtggaatcagctggtggtggcgccattaaaggcgtcatgaagatttttagcgttgtccttaaacctctagcgaaactattatcgccgtcggtgaagggggcatcatctaacctcgcgaactcacaggcggattccccgaacaacagtctcaccgaccgtaacaacaaggcccgcccatacgagcgcagctacgacatctgc…	4067	6625	+
ORF7	tail spike protein	atgtctagtggttgcggtgaggtaatgtcacttaatgatttacagatagctaaaaaacaccagattttcgaagccgaggttatcaccggtaaacaaggcggtgtagccggcggtgcagatatcgactacgccactaacccggtaaccgggcagacgcagaagacgcttcccgcagtcttacgtggtgctggtttctccccggcatcttttaattttacgaccgggggtactctcggcgtaaacgacgcagataaagctgttctttggtcgaaagaagatggtggagacggtaactactacgcatggcgtggctccctgccgaaagttatccctgcggcgtcgacacctcttgcgacaggcggcatttcggattccgcttgggacgcgttcggagatatc…	6638	8692	+
ORF8	hypothetical protein	atgaaatactcaattggtgcgaaatgctttttaataggctacggattggctgcggtcgctttacttatcactgctgtggttctgttatcataa	8814	8722	-
ORF9	hypothetical protein	atgaataatgagtttgatatcgacgcttgcaacgaattgataaaagacgccattaattcccgcgagcaacttctagctatgcaattaaagcgagaaataaaacgtatcagggaactcgaagaagaggttttacggctacggcagcaaagagacgctgctaacgcgcaacttgactggctactagaacaacaggaagttgacaaagagaggggcgctaaatga	9032	8811	-
ORF10	DNA helicase	atgggcagcggcaagtgcctgaaacgcgggactgaagttattatgtttgacggtacgactaagaaagtagaagacgttatcgtcggtgacgtgcttatggggccggattcaacacccagaaatgtactgtctctcggtagaggccgggagatgatgtacgaggttaagccgcgaaaaggagagtcttatactgtcaacgaaagccacatactatccctgcgaactactacagggatagcaaaaggttcatggccagataataccgttttcgacataagcgtccgcgactggcttaagttgccgaaatatgtaaccgggcctaatgggtatcttaagggttggcgggtacctgtcgattttccaaggaaagagcaggacgaggctttattgccaccgtac…	11410	9029	-
ORF11	hypothetical protein	atgaaatacgaatatgaccgcaaaccagcacgtgacatcgtaccgggtgacatgattttcaacgttaggacacgtagccctgttgccgtagatacagtatttgttgagtcaaacggtaaactggttattgaagacgtaaccggtaacgttacggcgttcgggcggaaggaattggtgctggtggtgaaatga	11687	11496	-
ORF12	domain-containing protein	atgagtactcctgaagggcgcgtgcaaaaatacgcaaaggagcgatttgaggccctgggtggcctcgttcggaaactttcctatgaggggcgctccggtgctcctgacctgttggttgttcttcccggtggtgtcatctggttcgtcgaggtgaagaaagacgaaagcacgaagccagacccgcaccagttacgagagcacgagcggatgcgcaaacgcggtgcgaatgtttttgttgttggttctaagaaacaggttgataaattaatagaacactattatatttag	12006	11719	-
ORF13	DNA polymerase I	atgaatctgctttatctcgatactgaaacattctcagaagccgatttgaaaaaagtcggttcctatgcctacgctgagcatccaactaccgaaattgttatttgcacctacgctttcgatgaaggtcctgtgcaagtatgggacgccacagacggcagcgatatgccgcgtgatttgcgtcgggcgatgctgaagctgcaaaaaccagacagcaatctcaaactggtaggccaaaacttccttatgttcgaccgaccagttattaagcattgctgggggttcgaactcctggtagaaaacattatagacactatgatagtagcgttccgacatgccctcccgggttcactggccgcgctgtgtgaggttttaaacattgacgcaagcatggctaaggat…	15191	12093	-
ORF14	putative ssDNA-binding protein	atgggaatcaaacttaatcttcgtaaagtacaaaccgcatggctgaacgtattcgaacgcgctaaagaccgtgaaaatagcgatggctccattactaaaggtacgtataacggtacttttattcttacgccggaacatccgcaaatcgaagaactccgcgatacagtatttgccgtagtgtcggaagcattgggagaggccgccgctgagaaatggatgaagcagaactacggcgaaggtaagcatatggataaatgcgccgtgcgcgacatcgctgaacgtgataacccgttcgaagactttccggaaggtttttacttccaggcaaagaacaagcaacagccattaatcctgacttcggttaagggcgaaaagcaggtagaaccagacttcaacatc…	15875	15249	-
ORF15	domain-containing protein	atgattctaaaagaacgcggcggtaataatgacgtgcatgcccttctgtcaccgtcaggagctaaaaagtggctggcgtgcagcgcatcgctggcctgtgaaaaagatatacccaacacatctggtaaagctgcggtattgggtacagccatgcacacactggccgagactcatcttaaccagtacataaaaggaactgagctgccgttagaacgcgatgtaggtgcgtatgtgctggaggaaggtaaaggcgctgttaaagcattaattaagccgatgaaaggtgcggtactgattacggcagacatgattgagcaggtgcgcaagtacaccgactactgcaaagctataatcgacgtagcaacttacgccaagctggaaatgcgtgtcaatcttact…	17231	15957	-
ORF16	hypothetical protein	atgttagaacaatttattaaattatttgaacgtttcgtagttgctcacgaactgattgctgcgaacagcgcgaaacagacgtctaacaaatccgtaagcgaaatgactgttgacgtctccgttgccggtgtcgagacagttaaaaaagaactggctaaagcactggaagaagtcgagaaagcaaaagaaattccggtcgaaggtgaggacatcgtcgacactaaaccggcagaagaggagaaaccaaaacgtaagccgcgtaaggcaaaagtagaggaaccagtacaagaagagaaggaagaaattgattaccaatctcttcgcgaccagattcaggctatcgacgatgcaattaacgaaggcccaagcgatgccgcgtgcgacgattctgacgaactg…	17785	17273	-
ORF17	helix-turn-helix domain-containing protein	atgcagcaatccgaattaggcgcccgcatagagcgccgccgcaaagaaatcggcatgggtcaaactgagcttgctttcaaagctggcgtatcccaaagccttattacccatctggcaaccggtcgggtgtgtaaggtagactgttttaaaatcttccacattgccgatgctctcggtgttgaccctcgatggttaagctttggtgatacaggggcctga	17919	18137	+
ORF18	replicative DNA helicase repA	atgtcaacaggtaatctagcatactcatggtcgcgtagcaatcgccgtgaggaacgcgctgacattaacgtttacaccacgacttccggcacctgggatgagttcgttgaacttatgcagccgcttaaacgttcgcgccggaaccccaagacagaccccggatatatcaccgccgcatgcacctcgactgtgagttccacaggtaaagaagccgccgaaggtatgttttaccgctgcaatgcgtccgtaacgtcttcgtccctggcttacgccgatgtggacagtgcaaccccggaagagtttgcaactgactgcgagatggtgcgagagtcacgttacgcaatgatgctctacaccacggcgtcccacaccgaagaagcgccgcgctatcgcgtcgtt…	20338	18152	-
ORF19	hypothetical protein	gtgacggatttccagaaaagagtatttagagctgtagctgctcttacatttaaaaaggggtcatgtagtgttcttgacttgcgccgggcttattttcagtactatagttcctctctcattgagaggtcgttggaagttttggttcgagacggagcagttaaaagtaaggccggaaaatattcggcagtagctgaagttaaaggctttcaggcgacaccagaagaccttgaataa	20628	20395	-
ORF20	DNA-binding protein	atgacacagaatgaagtagctgagcttattggggttacccgtcgcacgctgaataactggttaagagacggcaagttcccggattgttgtgtccggattatgggccgccggatgccgggaacattcgacagggagaaagtggaagcgtggattagggagaatgtaaagtga	20795	20625	-
ORF21	hypothetical protein	atgtttaagaagggccagttagtgcggtgtactatctctcacgaatattacatagttcttgaccagataagaaagatgttagctgtcaggagtgtaagttgggggcgtgccgggtttatggacgcgcggtatgtaacgttaatcggaaataactacacggcaaaagattctaaagagtctgcgtcggtgaatctcgggtcttaa	21389	21592	+
ORF22	ASCH domain-containing protein	atgaagaacttgcagttggctgtgaaaagtgaatatttcgatgccatgattcgcggggagaaaacggaagagtatcgcctggtaaatgattattggtggacgcgccttgttggtcgtgaattcgaccgtttgattataacgaagggttaccctaaacgggacgataagagcaggagaatagagtgtaagtaccgtgggtatgagattaaagaaataacacacccgcatttcggcagtgaaccagtggaagtttttgcgataaaggtggagttatga	21608	21883	+
ORF23	hypothetical protein	atgaaaccgaacgacctcgtaacctgggccgggcgtaacggagagaccagacacggcaaaataacgtcgcttcacggcatctatgttcgcgtcgagtggtggcggacccatgctaagaagcctcgtcgcattctgacgcgtcaggatagattaatcgcgaaatag	22223	22387	+
ORF24	hypothetical protein	atgacgagcatacttttcatatgggtcgtgtccgctggtcagctacaactggccgggacagaaacgttttacacgttagaggcgtgccaggtagccgcacgcgctgcggagaacgcgccgttaactttcgtagagcgtcctgttgacgctcaggtacgcggtatttgcacactgaaacggttatctaagcagggggagagatga	22448	22651	+
ORF25	hypothetical protein	atgagtctcgcgaccgatatactgaaacacgccggcatcaacctggcacctccttcatcggcggtaacaaagaaggttacccgcatcaaagaaaaggttaaacgcaaacctaagccgcgtgtaaagccggttaacgagatgcctgacgtctatccgcgcatccccggagtacaccagcctaaatattgtgtaggtaaaggtctgtggcgcgcgcactcttacgacggtaagaaagtggtaaacctcggtgagttcagtagccaggcccgggcgcatatggcggttaaactgtacaaactgtggcgtaaacgtgggtattccgaaatcccgcacaagccatctattcgactttatacgttcaggtaa	22648	23013	+
ORF26	hypothetical protein	atgactacgatagcttttgacggtgaaacgatggcctgcgatacatgtgtcacggggaattttaaatactatacggataccaagatttacgagaacgaccacttcgttatgggtgtatccggggacgccggggtgggtaggctgttggttgtcgatgccgagatattgacgcctaagtactacgacttcgacttttcagcgctggtgtttgttaaagaggataagcgtattttcagggtagaattcttcaagtcatgggattcgccgttaagctcagttataccaattacgggtaacgcagcggccgttggctccggtgctccgtatgcacttacggcgatgtttatgggtgccgccgctactgctgctgtcgagatagcgaagcgcttcgaccctaat…	23019	23453	+
ORF27	holin	gtggacgataaatacctttggcttagtgtggcgggcctcgccgggggtgccgtatctcagattaagaagcgcgaggctatttcaccgtggttgagattgtgtcacctggttgcctcagcatgttgtgcggtgtacgcatcccccatcattataagttactatgaattatcacagtctgagggtcagtacctggttccttttggcgtaggtatgttctggcttaaattatttgaggccgccgactcgtccctcagcaactttaagttaccgtgggggaaataa	23532	23813	+
ORF28	holin	atgctcaactcaccaatcggcgccatttgcctggtcgcaatcatcatcacctcgttaattaatatctacgcgcactggattgaagacggtcttttcgggcggctgctgtatatggcgtccgttgttaccgccgccggtgggctagctcatctctttaccggtggcatcccgccattcataattacgactctcgtcgccatattcgcgcttaaatcggtacgccatatttgcgtgaaaggcgcccgctactacaaataccggaggatgtatgtcaaaccgaaacatcagtga	23815	24105	+
ORF29	lysin	atgtcaaaccgaaacatcagtgacaacgggttacacttcaccgccgcgttcgaggggttccgcgggaccgcctaccgcgcgacaccttcagaaaaatactttactattggctacggccactacggcgcagatgtaaaagaaggtcagaagattaccgaaggccagggtctcctgcttctgcataaagatatggataaggccgtagctgcggtagacgccgtcgcgcacccgtcgctaaatcagtcacagttcgatgccgtgtgtgacctggtgtataacgctggcgccggtgtgattgcggcttctaccggaacagggcaggccctgcgtaagggcgacgttgccacactgcggaataagttaactcagttccattatcagaacggcaaatcactcctc…	24083	24571	+
ORF30	hypothetical protein	atgaacttacaaagcgataaagttttttaccattgcaaaccggtgcttgacaccgaagcatttaaagacgcgcaactgatggcacgcattgccgttaataacctgagcacacgaattcccgccgacgcgttctggttcgccgcgatgcagacactgaaagcagcttatgcaggagagaaggaatga	24757	24942	+
ORF31	DUF2737 family protein	atgagtgacaacggacaggtagcagtaacgttaaaggtgggcgggaaagtaggcaatacaccattcccaacacgcgaggagctgttaaaacgtaacagtttccctgggccggaccagaacaagtatctaaatcgcatgtggggaaagcgtaaatga	24939	25094	+
ORF32	hypothetical protein	atgatgactgaccgcgactacgaaaagatgatggtagaggccgcaaacggcaggttgaaaattgaagccattgacgcgcagattaaggcacaccaagccgcgcttgattaccttaacgaacaccggcgtgagcttattaaccgctacgaccttaacaaatacgtaggtggggggaataaatga	25091	25273	+
ORF33	hypothetical protein	atgaatcgtgtatgtaaagaaactttacgccagcgaattatgtatctggagtcggtaagtaagttaggtctgtcaatgagtgaagaattccatttagaagcatacaagatgctgctggaacgacttgagaaggagagcgaacaggaatga	25270	25419	+
ORF34	hypothetical protein	atgatgagagagtattggcgcattaatgggtgcaagcgaggtgcctggcgtacgatacgtttattctttacgtggtatgccgaaacagtatttggtcgtaggttcgaagccatacatagtcgcgggtggcgatgggaagccgtaggtaaatggtgggtttataaagaggagagtggagaatga	25760	25942	+
ORF35	hypothetical protein	atgattgagattttgaaggctaccgattccactggcgacctgatgttttggtttgcctttctcagtgcgctaataaaacaaccgactgtgtttaacagtcttccccgatatctgtggtggcctatgtttttaggcttgggtgtatcaggagcggccggcatcctgctgtggtttttcaaatga	25939	26121	+
ORF36	hypothetical protein	atggtagaagagcactacgacacggcctatataactgacacaagcccgcatatgcgggcttttctgtacacaggcctatctttccctatacaatccttaatagacgctcagggggtgtctgatgcgctatga	26182	26313	+
ORF37	hypothetical protein	atgcgctatgatggtcatacgcatttaagagaggattgcatgaaactcaaattaaaacagcctgacgccgaagtagtggctgccgcgcacgaagaagcggttaacgcaaaccgtcgccgtaaacgtccgcgtggtaaacaaagcctgtatcagtcatccagacattccgccgaactatgggacccggactattgcgacgaattaatccggttcttcgaccgcacgtcatgggaactcgtacccacgtctaaaggcgacgaacgcccgcttatccaggacaaaccgccgtcgctggcccgcttcgccttacacatcggtgtaaccatcccgattatcaagctatggctccgagaggttcccgcattcgccgaagcatatgagacggcacaagccctggaa…	26303	26848	+
ORF38	terminase large subunit	gtgaacgttgatatcacagctacgggaccgcagggcgcgttccttaatctgcattgtaagttcccggccttcgtcgctggcttcggcacaggtaaatcggaagtcatgtgcaactccgccctgttagacagcatggaaggtggtagtgattcacttatcgccatgtatgaaccgacatacgacctggtgcgccttatcctcgccccgcgtatggaagagaagttgtctgattggggtattcgttacaagtacaataaatcagacaacataatctatacatcatccgggcaattcggggattttgtcctgcgtacattggataacccggcgcgaatcgtcggttacgaatcttttcgcgcaaaaatagacgaattggacacgttaaataaagaccacgcc…	26838	28109	+
ORF39	structural protein	atgttaacagcaaacggccagggttctggcgtaaaaaccaagcaccgcgaatggctgcactacgcgccgaaatggcagaaggtgcgccatgcgcttgccggggacctggttggctacttacgtaacgtcggccttaatgaaccagataaagcctacggcgaagcacggcaggctgaatacgaggccgggggtatcgtctacaacttcacccggcgcacgctgtcagggatggttggtagcgtcatgcgcaaagaaccggaaatcaatatcccgaaggagttggaatatctgcttaaaaatgcagatgggtccggtgtaggcctaatacagcatgcgcaggacacgctcatggagattgactcagtaggtcgtggtggtcttcttgttgacgccccggaa…	28122	29597	+
ORF40	hypothetical protein	atgaaagcgcagactttagagttcccctacggtgaaattgagttcaccagcgatgagtatattgatgcgtcaacactaaccattcaaatgaaccaatggagatttgataatggtcttcaaccaagaaatcttgcgcagatactgaaaacggacgactgcagagacttcatgcgtgtttgtgaagaggagactggcgttgttccgttgaaaacaacgagagggaggaacgggaaaacgtggttaagtcttcatttggcggtatatattgctgagcaatacagcacttattaccacttcctcgttatagaccgtttcttaactcaacggcaggtagaactccgtaacattggtgctgttagttttgtagaacttaatgccgccgttagccggatgattgag…	30278	29628	-
ORF41	head morphogenesis protein	atgccactacttacatcattaatcagccatcaaatatggctgcaacgcaacgccagtagcgaagtaaaagacctggcgccattcatccagcagatgcgcgatgaggttaagcgacaggtgttgttgtttggcgatgacagcagaacggcggcgagacttaccatcatgctgcgggaacttgagcaagcactgaacgggattacgtctgggtggtatgagaagctactggctgatgcccgtgagctttcagactatgaagttaactggaacgtaaaaaccctgtcgaccaacgttaacgctaatttcgtaaccccagccgccgagcaagtgtgggccgccgctactttcgcgcctcttgaactaagcgaaaagccagttgattttgtttctctaatgagt…	30444	31487	+
ORF42	neck whiskers protein	atgggctttttcaaagttaaagatgtgccttcacgacgtgtagttcagtactcccgtgtgtctggtgcgggtgaaggtgtcgtgtatatcaaagatgaatcggttctcggtgaatcggtggacgaaatgccgtttgcagataagacaggactggcggctatctccgacggcatcctgtacgaggtaccgtatctggatggggcgggcgatgtgtacttcgatacgcaaccggtagacacaaaactgaaagacggttccgctaaactaaccgtagtcgtgaaaggtggtaaggctccttacgatttgcaatggtttaaaaatggtaaagaggtgatcaacgtcccgtacgttgagggtgaactaactgttaaagacccgggggagtatttcgtcagggcg…	31490	31948	+
ORF43	hypothetical protein	atgaattggaaagtaaccgcagtaatcacggcagccggtatcctatccttgtggttatacggccagtacaactacagaagcgggtgggtagaaggccgagagaatcttgtttcacagcaacaaaagaaggcacaggccgagttagcgaagaaaacacaacggcagcagcagaacgataccaaggccgccgccgccgaatctgaaggtaaagaaaatgcggaggctatcacccgtgaagttatcaaatacgttacccgccctggccgtgttgtttgcgagtttcatcctgaacgggtgtcaatcaaacgacgtgccgccgagaatgctaattccatccccggatacgacgttgatgcagcccccgtgcaaaatggtgctaccaagtag	32266	32652	+
ORF44	hypothetical protein	atgaatcgttttttacgttacccgcttcatgaagaagccggggtagaagataaaccgggtgcaggtgacgcaccaaaaatgtacaccgccgaagaagtgcaggccttgattgagaaagaagtggccgggctcaaggcaaatcaggaagcgctccttagcgagaaaaaggaagccgcgcgccgggctaaagaagccgaagaagaacggcaacgcgcccaccaggaagccttgaaggccgccggtaaaatggacgaatttgaaaagacgattcgtagtcagtatgaacctgtactgaaagagaaagaagaacgctacgcttctttagccgcgcgaattcttggaagtgaacgtaaggctgttttgggttctttcgctggtgattttatcaccccagaagcg…	32846	33547	+
ORF45	putative coat protein	atggcaatcaccactattggtaacatcgtaactggcaatatccctgtactggcgtcctatatgacggaagacccggtagagaaaaccgcgtttttcaactccggaattttgactccaactccgtatgctgccgagattgcccgaggcccgtctaacatcgctaacctgccgttctggaaagctatcgatacttctatcgagcctaactactcgaatgacgtataccaggacatcgcgaccccgcgcgctattcagaccggtgaaatgatggcccgcgttgcatatctgaacgaaggtttcggccaggcagacctgactgtagaacttaccagccagaatccattgcagtctgtagcctctcgcctggataacttctggcagcgtcaggctcagcgtcgt…	33551	34600	+
ORF46	hypothetical protein	atgtcaaagacaggtaaagggctgccccgcagccttgttaacgcggaattcgatattcccgcggcgaccacaacggcaatcggaggggttaaaaagtccgctacggtagcggcaccaccggcgattagcgcgggtagcggtgcagccgccgccgccgccgctgcacctacgaaagaagagttcgacgcactggtcaccaactacaataagttgcgtacggatgtgacttcattgcacaccgccgttactaatctgttaaccgcccttaaaaacgctggtactgtatcctga	34661	34951	+
ORF47	Hoc-like head decoration	atggttgatgtaattaaacgtcgtattgttggtgtatctgatgatagtccgcaggacgggcaggtagagattgatatggaaaacgtgacgccgttgcgtttctctaccggtctcaatgatactacctcggtaacatctgggcaggctatcaccctgacggtggtacttgccgacggaatggaccctaaaaccgttcaatggtataaggataataacgctatcgctggtgcaaccgctttgacttacactaaggccaactccgcagcggcggattccggtacttacaaagtcgtagcgcacgacggttacggtaatatcatttcagatagtacggtagttaccgtaagttaa	34963	35313	+
ORF48	head-tail joining protein	atgacagataattacgtagtacgggaacaatacaagggtgtggtcgaggttgacgggcagttagtcccgatgcgcgaagaagcgaacccggaagcattaatcgaaactcagccagtggtcgaagaaccgcattacaacggtggcggagagcctaagcagcgtcgtcgccgcaaaagcgtagaggaataa	35350	35538	+
ORF49	ssDNA binding protein	atgccgcttatcgtggaaaccggtcaaggcatcccgaatgctgactcttacgtcagcctggaagacgggcgcgcactggccgctaagtatggtctcgaactaccggaagatgacaccgcggcggaggccgctcttcgtaatggcgcggtgtacgtcggcctttttgagtctcagatgtgcggacgtcgagtatccgctagccaggcgctggcgttcccgagaaccggtattactctacacgggttccctcaaccgtccaacgttatccctccgttaattgttcaggctcaggtaatggctgccgtagagtatggcgcgggtaccgacgttcgagggtctacagacgggcgagaggttcagaccgaacgagttgagggtgcggtaaccgtgtcctacttt…	35542	36051	+
ORF50	neck protein	atggctaagactaaatcagaaatattttcccttatcggtgccaacttccctgataaccagtctggactaattacacctgaaaagttgcgcgaagttaccactcagatggcggattctacgctgtacggcgttaaggaaatagaggtacttcgcgcgtcgactacggatattcaggcgccaactaccacaggtacagcgttaaccgaatcctttggtggggcgcagaaaacaagcgctgaccctgtgatgattaatgcatccggggtagttacgttcaacgccgctggtaactacgctatccgtgttaaattgcaggctgggcgcaccggggcgagcggaacatccatccttctgtcgcgtgttcttctcggaggtgcgcaattcggatcaccagccgcg…	36054	36659	+
ORF51	putative tail protein	atgagcaccgctttcagtaaaaggatgcaaggtgtaggaactcacctgttaacaaaatacggcagtaccgtaatcttgattcagaaaggtcaaaaaacatgggatcctgttttaggagagtacgtttggggggcggacacgacggtacctcttaaatcagttccggtacctgttaacgcggggctggtaaacggaactaccattcaggcaggagatatggtggttaaggccgattacagcgtaattcctaagatggatgataaagtacaattcaatggtgaacagtggtctgtggtcaccatcgagaagaagatggttaacgatgacgttgtagcatactttatccaggtgagaaaatga	36659	37018	+
ORF52	family phage protein	atgagttttgcgcttgatgtgtccaagttcgtggaaaaggctaagaagaatcctgaaaaggtaattcgtcaggtatctatcaagttgttttctgcgattatcaaagcgagtcctgtagatacaggtcgctttcgtatgaactggatggcgtccggcggtactcccgccgacggaactacggacgctaccgataaagctggcaccacggcgaccagtaatgccgctaatttcgtgctaaatgccgctgactggcacacgtttactctaactaacaatttgccgtatgcgcagcgccttgagtatggttggtcgcaacaggcgcctcaaggcttcgttagggttaatgtcagcaggttccagcaattattaaatgaagaagcctctaaggtgaaataa	37015	37410	+
ORF53	tail protein	atggcaacatatttcgaggatttaacaaaagcatttgacacggcactggtagcattcggcgttaacaacggtataaaggttgcgttggagaacatcgacgcaccgacgtctacggatgtaccatatttggcgagttatatgttgttggccgatacggaacaagctgacctgttctggaccgagcaacgggcaggtatttatcaggtggacattaacgttgggtctaccttgggtagcgcccctctcaaccggttagctgataagctaaacgccgccttcgccgccggtaactgttttagtcgtaacgaaatctgtgctgaggtacaatcagtaagcctcggtcctcttattgttgagaatggatgggcgaagaggcctctctcaattaatttcatagca…	37410	37829	+
ORF54	putative tail protein	atggcgttacaaccatataaaggcgcgatgaccgcgcagttttacgttcttgagacgacgccgggggtaacacccactaacccggtatggcaaccactgcgcaacactgggggtattcccgccgtaacccgcgacgccctcatctctaatgaactggacggcagccgtgaaacatcatctatccgcaccggtaaccgtcaggtaactggtgaatatgctattgaacttagcgcggaaagccaggatgagttgctggccggcgcaatgaccagttcctgggtagcaggttccactaaatcgggaatcagcgttaccgtagacccggtggcgaaaactttcacacgcgcagacggtagctttgtgacagacggcgttgaagtaggcgacctggtgcaattc…	37829	38998	+
ORF55	putative DNA-binding protein	atgaacgaattaatgaatgttagtgaagcacaaaccatgtccagccgtgagattgcggaactgacaggtaaggagcataaaaatgttctggctgatatccgcaaaatgttgtctgagattcaatcggctgaaaagtcagccgattacaaagacagcaaggggcgcacgtataaaatgcttcttttggataaagaggaaacgttaattctgatttcagggtacagcatcaaaatgcgcgctgccatcatccgccgttggcaggaactggagtcacgagcgagcaaaccatccttaccggtgccccagacaatgggggaggctttaaggttggctgcggacttgtgggaggagaaagaacgccttgcgcttgagaacaaggaaatggcaccaaaagctgat…	39702	39031	-
ORF56	hypothetical protein	atgactaacaaatacaatcgcacaatgacaaatactgacggagatagcattacctgtgatgtgtacgacgttctgagggcatttgatatccgcgacccggcactacagcatgcgttgaagaaactgttgtgtatgggcttgcgggggcacaaggacacaggaaccgacttagcggaagcaattgaaagtctggagaagttacggaaataccgtagtaatattgatgagtga	40045	39815	-
ORF57	hypothetical protein	atggtcactcgcaaaataacagatgaacagttgcaacaagagctaaatgccgggctcggcccgactgaaatagctaagaagtacaacatgtcacgccgtaatgttcagcttcgttccgcgcgcctggcaaagaaaggagttggccacggtcgcgacgtaagccaccttgtacctgatgggtataagattaagggtacgtcgtcactggtagatgaattcggtaacacgaaacttcaatgggtgaaaacagatactgatgctgaacgtcaggtagaattaatgcgagccgttgtggatgagatgaaaaaagatttacctaaatataaacctgtcactttgcccaaaaatggcacagatgacgacttattaaatctctacacaataacggaccatcacatt…	41269	40115	-
ORF58	superinfection immunity protein	atgagcgtttttatcggtattatcgcgtttatctatttcatcccgttcctggtagccttgctacgtaatcataaagcgaaattaggaatattcgtatgtaatcttttactggggtggattcttctgccgtgggttggggctctcatctgggcctgtaactctaatgttaatggtaaataa	41511	41332	-
ORF59	hypothetical protein	atgaaacttagcgatttttactacgaagcagaagccgagaaaggcgcgcgtatgccgattcctttaaaagatggtacagattcaggggaatggttgaacgttgtctctcctgaggctgatgttgcggttaaagctatgcgggccttcaccctggcgtaccgagcggcggtaggtaaattaaaaccgcttcgggataaatgcgaagagcaaaaagacttctcagaatacaatttaaaaatggaagacgcggcgggagacctaaaccggcaattggccctcgaattggtgaatggctggagtcttgatgacgagttcactaaggaaaatcttaagactcttctcacccaatataagcgcctggcggaacatgtagtcgtattccaccacgaacagttgcgt…	41681	42097	+
